# Supplementary material for: Quantitative prediction of mouse class I MHC peptide binding affinity using support vector machine regression (SVR) models
Source: Springer Nature journal article supplement (doi:10.1186/1471-2105-7-182), 2006-03-31

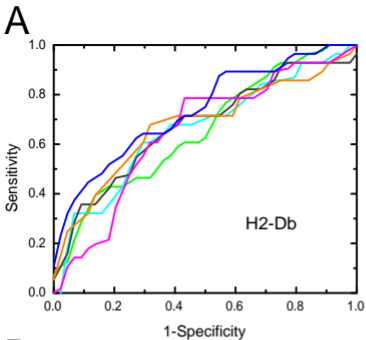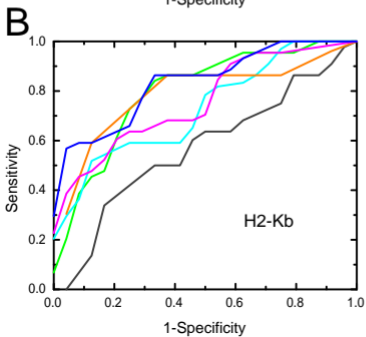

Supplement: 12859_2005_921_MOESM1_ESM.pdf [file 12859_2005_921_MOESM1_ESM.pdf]
